# Supplementary material
Source: PubMed Central journal article supplement (PMC4560009)
Supplement: 10.4085_1062-6050-49.5.08.S1.pdf [file 10.4085_1062-6050-49.5.08.S1.pdf]

## **Supplemental Figure 1.**

Serial changes in sagittal-plane biomechanics before, during, and after the 90-minute intermittent exercise protocol (IEP). A, Factor 1 depicts ability to dissipate landing forces at the hip. B, Factor 2 depicts hip extensor loading. C, Factor 3 depicts ability to dissipate landing forces at the knee. D, Factor 4 depicts knee extensor loading. E, Factor 5 depicts ability to dissipate landing forces at the ankle. F, Factor 6 depicts ankle plantar-flexor loading and anterior shear forces. All values represent standardized scores. A factor score of zero represents the mean factor scores across all participants and time points.

**A**  
**Factor 1: Greater Hip Flexion Motion and Energy Absorption**

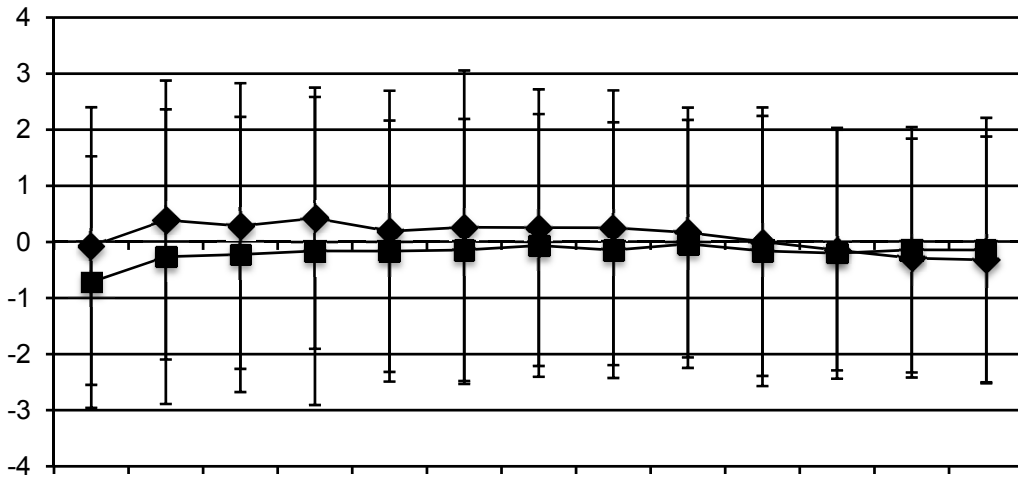

**B**  
**Factor 2: Greater Hip Extensor Loading**

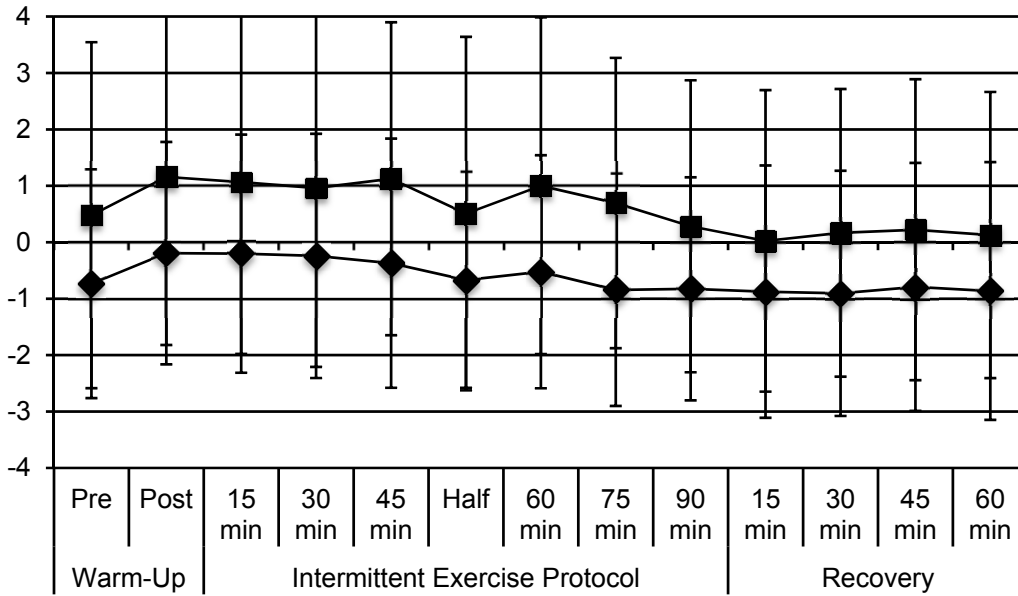

**Time**

◆ Women    ■ Men

**C**  
**Factor 3: Greater Knee and Ankle Motion and Knee Energy Absorption**

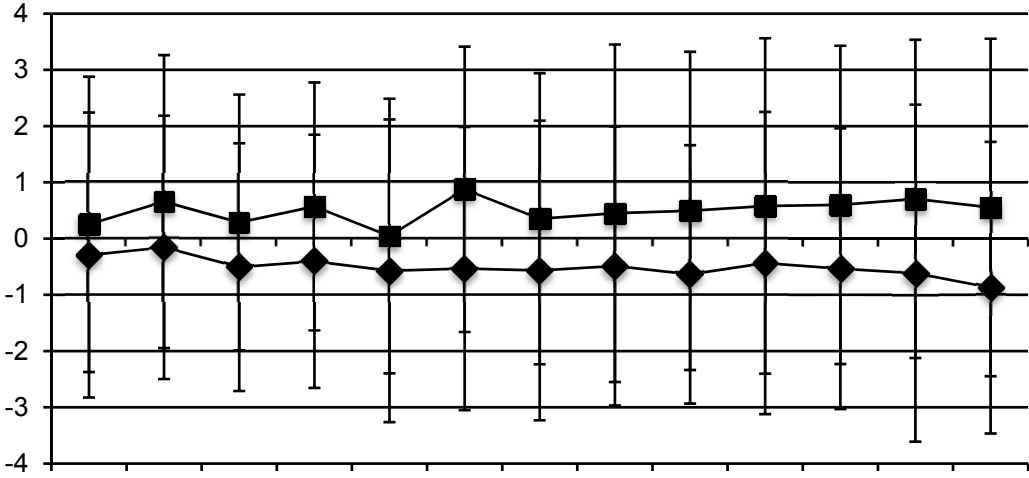

**D**  
**Factor 4: Greater Knee Extensor Loading**

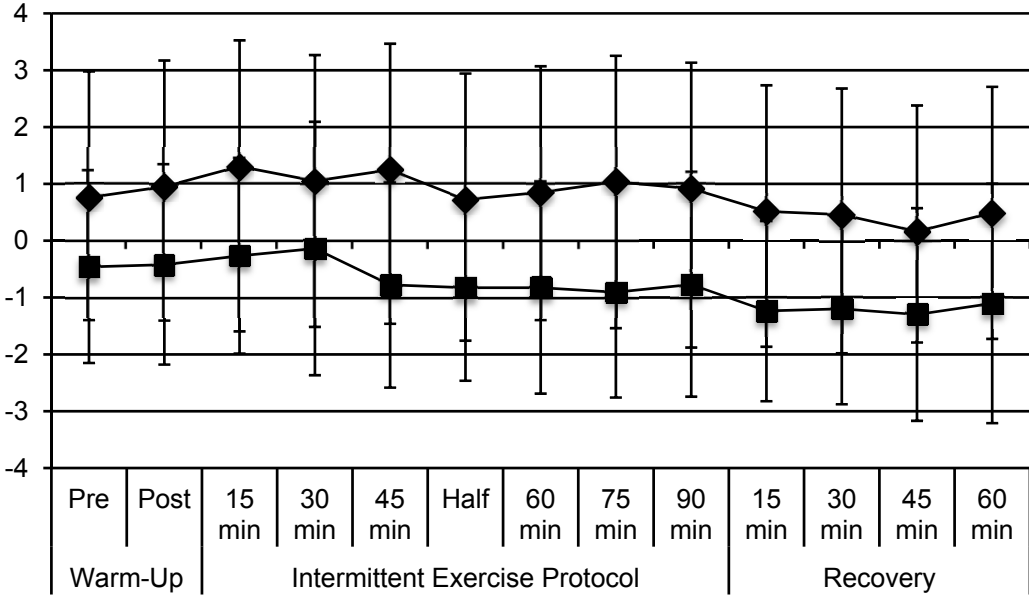

**Time**

◆ Women    ■ Men

|         |      |                                |        |        |      |        |        |          |        |        |        |        |
|---------|------|--------------------------------|--------|--------|------|--------|--------|----------|--------|--------|--------|--------|
| Pre     | Post | 15 min                         | 30 min | 45 min | Half | 60 min | 75 min | 90 min   | 15 min | 30 min | 45 min | 60 min |
| Warm-Up |      | Intermittent Exercise Protocol |        |        |      |        |        | Recovery |        |        |        |        |

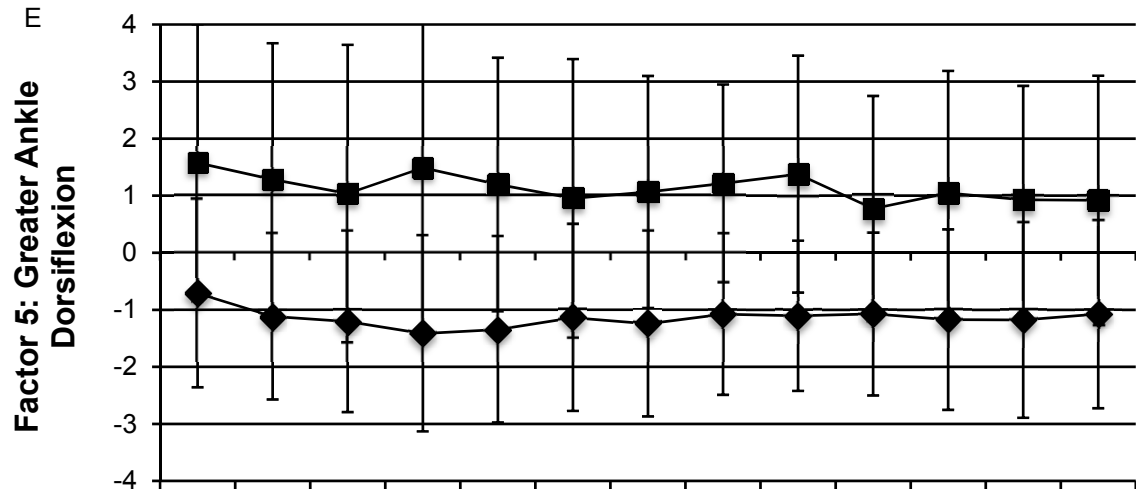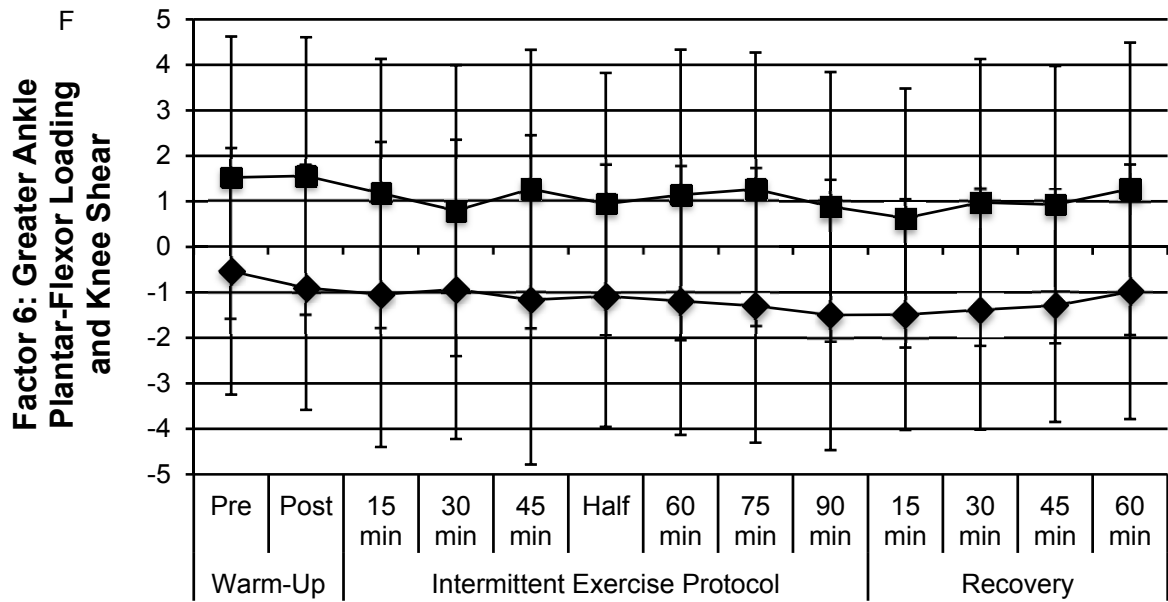

**Time**

◆ Women    ■ Men

## **Supplemental Figure 2.**

Serial changes in frontal- and transverse-plane biomechanics before, during, and after the 90-minute intermittent exercise protocol (IEP). A, Factor 7 depicts dynamic knee valgus position. B, Factor 8 depicts frontal-plane valgus knee motion. C, Factor 9 depicts knee internal rotation motion. D, Factor 10 depicts knee external rotation. E, Factor 11 depicts transverse- and frontal-plane hip and knee moments. All values represent standardized scores. A factor score of zero represents the mean factor scores across all participants and time points.

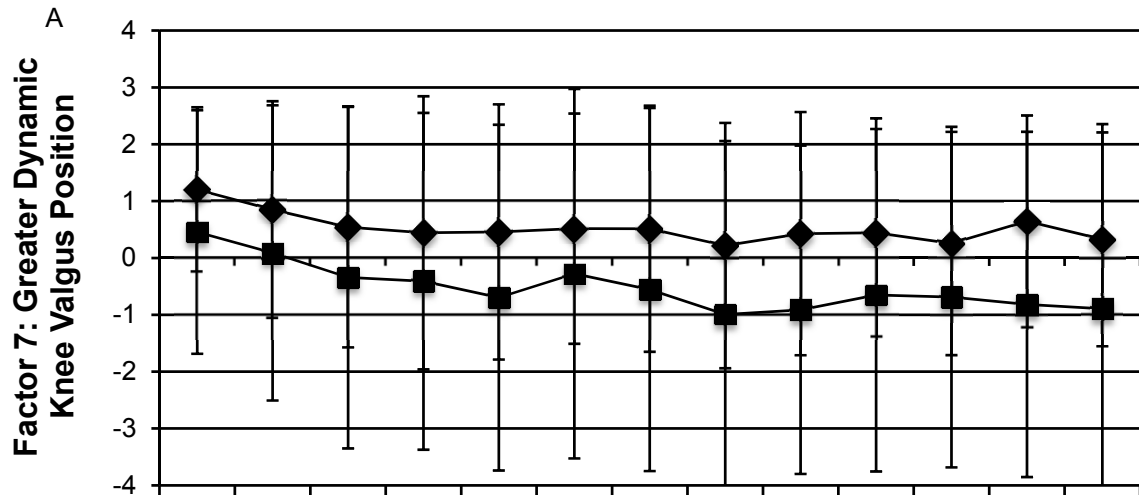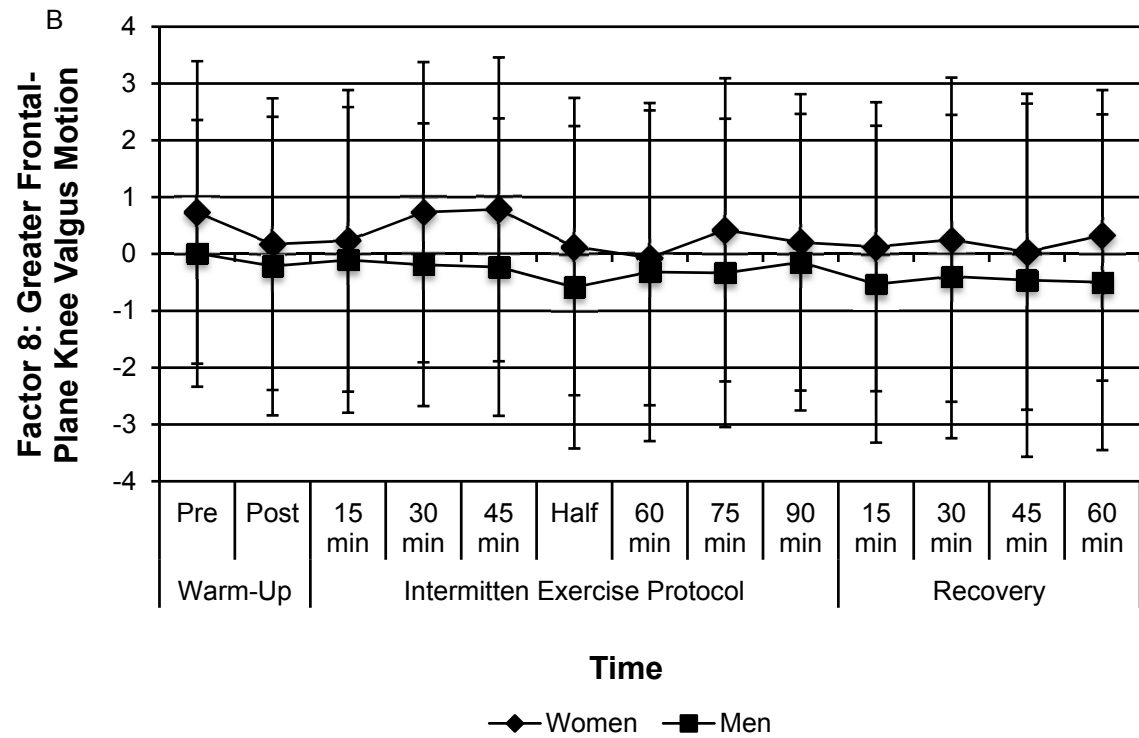

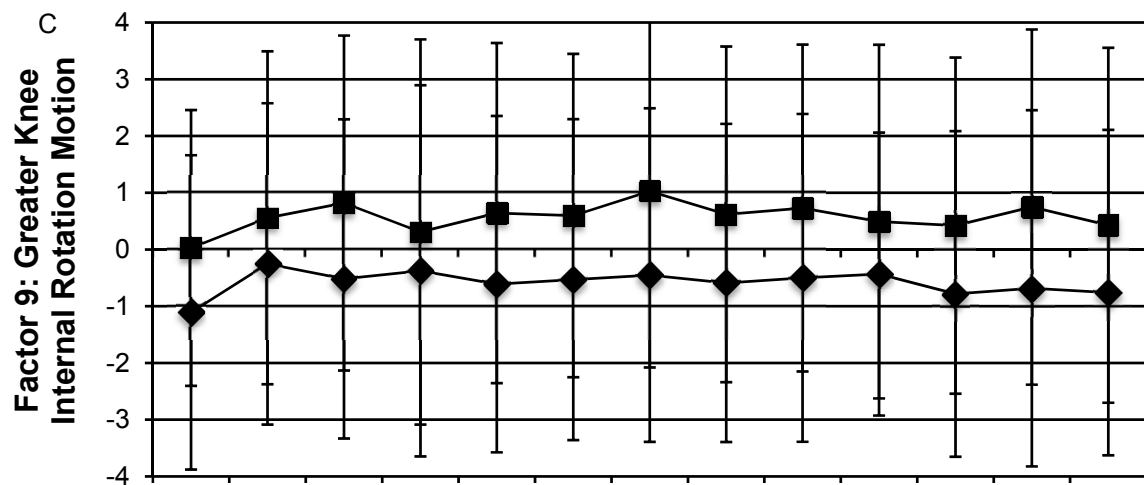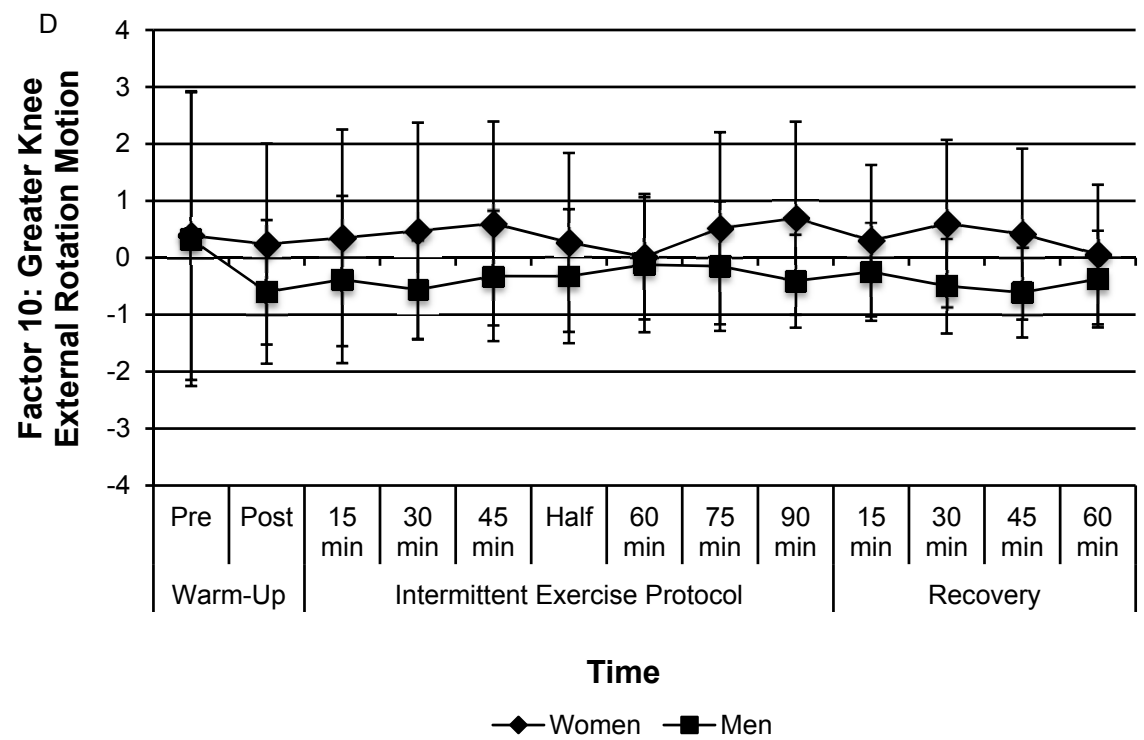

|         |      |                                |        |        |      |        |        |        |          |        |        |        |
|---------|------|--------------------------------|--------|--------|------|--------|--------|--------|----------|--------|--------|--------|
| Pre     | Post | 15 min                         | 30 min | 45 min | Half | 60 min | 75 min | 90 min | 15 min   | 30 min | 45 min | 60 min |
| Warm-Up |      | Intermittent Exercise Protocol |        |        |      |        |        |        | Recovery |        |        |        |

**Time**

◆ Women    ■ Men

**Factor 11: Less Frontal- and Transverse-Plane Moments  $\square$**

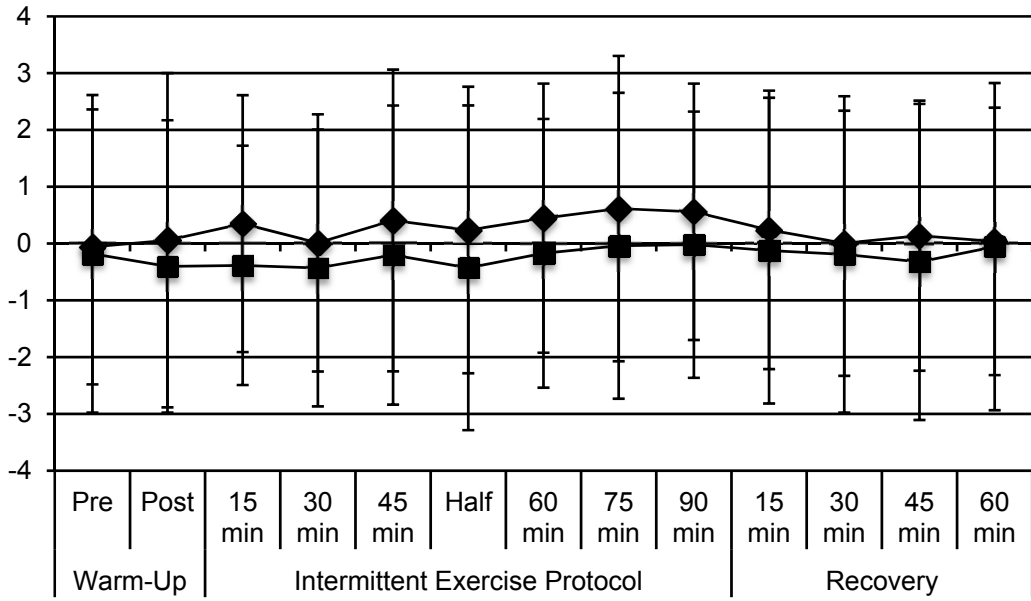

**Time**

◆ Women    ■ Men
